# Supplementary material
Source: ML conference proceedings conference paper supplement (https://proceedings.neurips.cc/paper_files/paper/2021/hash/bdc6c33585d0cf5d2a8cb83141cd037f-Abstract.html)
Supplement: Supplementary file 1 [file bdc6c33585d0cf5d2a8cb83141cd037f-Supplemental.pdf]

---

# Contextual Recommendations and Low-Regret Cutting-Plane Algorithms

---

Anonymous Author(s)

Affiliation

Address

email

## Abstract

We consider the following variant of contextual linear bandits motivated by routing applications in navigational engines and recommendation systems. We wish to learn a hidden  $d$ -dimensional value  $w^*$ . Every round, we are presented with a subset  $\mathcal{X}_t \subseteq \mathbb{R}^d$  of possible actions. If we choose (i.e. recommend to the user) action  $x_t$ , we obtain utility  $\langle x_t, w^* \rangle$  but only learn the identity of the best action  $\arg \max_{x \in \mathcal{X}_t} \langle x, w^* \rangle$ .

We design algorithms for this problem which achieve regret  $O(d \log T)$  and  $\exp(O(d \log d))$ . To accomplish this, we design novel cutting-plane algorithms with low “regret” – the total distance between the true point  $w^*$  and the hyperplanes the separation oracle returns.

We also consider the variant where we are allowed to provide a list of several recommendations. In this variant, we give an algorithm with  $O(d^2 \log d)$  regret and list size  $\text{poly}(d)$ . Finally, we construct nearly tight algorithms for a weaker variant of this problem where the learner only learns the identity of an action that is better than the recommendation. Our results rely on new algorithmic techniques in convex geometry (including a variant of Steiner’s formula for the centroid of a convex set) which may be of independent interest.

## 1 Introduction

Consider the following problem faced by a geographical query service (e.g. Google Maps). When a user searches for a path between two endpoints, the service must return one route out of a set of possible routes. Each route has a multidimensional set of features associated with it, such as (i) travel time, (ii) amount of traffic, (iii) how many turns it has, (iv) total distance, etc. The service must recommend one route to the user, but doesn’t a priori know how the user values these features relative to one another. However, when the service recommends a route, the service can observe some feedback from the user: whether or not the user followed the recommended route (and if not, which route the user ended up taking). How can the service use this feedback to learn the user’s preferences over time?

Similar problems are faced by recommendation systems in general, where every round a user arrives accompanied by some contextual information (e.g. their current search query, recent activity, etc.), the system makes a recommendation to the user, and the system can observe the eventual action (e.g. the purchase of a specific item) by the user. These problems can be viewed as specific cases of a variant of linear contextual bandits that we term *contextual recommendation*.

In contextual recommendation, there is a hidden vector  $w^* \in \mathbb{R}^d$  (e.g. representing the values of the user for different features) that is unknown to the learner. Every round  $t$  (for  $T$  rounds), the learner is presented with an adversarially chosen (and potentially very large) set of possible actions  $\mathcal{X}_t$ . Each

36 element  $x_t$  of  $\mathcal{X}_t$  is also an element of  $\mathbb{R}^d$  (visible to the learner); playing action  $x_t$  results in the  
 37 learner receiving a reward of  $\langle x_t, w^* \rangle$ . The learner wishes to incur low regret compared to the best  
 38 possible strategy in hindsight – i.e. the learner wishes to minimize

$$\text{Reg} = \sum_{t=1}^T (\langle x_t^*, w^* \rangle - \langle x_t, w^* \rangle), \quad (1)$$

39 where  $x_t^* = \arg \max_{x \in \mathcal{X}_t} \langle x, w^* \rangle$  is the best possible action at time  $t$ . In our geographical query  
 40 example, this regret corresponds to the difference between the utility of a user that always blindly  
 41 follows our recommendation and the utility of a user that always chooses the optimal route.

42 Thus far this agrees with the usual set-up for contextual linear bandits (see e.g. [8]). Where contextual  
 43 recommendation differs from this is in the feedback available to the learner: whereas classically  
 44 in contextual linear bandits the learner learns (a possibly noisy version of) the reward they receive  
 45 each round, in contextual recommendation the learner instead learns *the identity of the best arm*  $x_t^*$ .  
 46 This altered feedback makes it difficult to apply existing algorithms for linear contextual bandits. In  
 47 particular, algorithms like LINUCB and LIN-Rel [2, 8] all require estimates of  $\langle x_t, w^* \rangle$  in order to  
 48 learn  $w^*$  over time, and our feedback prevents us from obtaining any such absolute estimates.

49 In this paper we design low-regret algorithms for this problem. We present two algorithms for this  
 50 problem: one with regret  $O(d \log T)$  and one with regret  $\exp(O(d \log d))$  (Theorems 5 and 6). Note  
 51 that both regret guarantees are independent of the number of offered actions  $|\mathcal{X}_t|$  (the latter even being  
 52 independent of the time horizon  $T$ ). Moreover both of these algorithms are efficiently implementable  
 53 given an efficient procedure for optimizing a linear function over the sets  $\mathcal{X}_t$ . This condition holds  
 54 e.g. in the example of recommending shortest paths that we discussed earlier.

55 In addition to this, we consider two natural extensions of contextual recommendation where the  
 56 learner is allowed to recommend a bounded subset of actions instead of just a single action (as is often  
 57 the case in practice). In the first variant, which we call *list contextual recommendation*, each round  
 58 the learner recommends a set of at most  $L$  (for some fixed  $L$ ) actions to the learner. The learner still  
 59 observes the user’s best action each round, but the loss of the learner is now the difference between  
 60 the utility of the best action for the user and the best action offered by the learner (capturing the  
 61 difference in utility between a user playing an optimal action and a user that always chooses the best  
 62 action the learner offers).

63 In list contextual recommendation, the learner has the power to cover multiple different user prefer-  
 64 ences simultaneously (e.g. presenting the user with the best route for various different measures). We  
 65 show how to use this power to construct an algorithm for the learner which offers  $\text{poly}(d)$  actions  
 66 each round and obtain a total regret of  $O(\text{poly}(d))$ .

67 In the second variant, we relax an assumption of both previous models: that the user will always  
 68 choose their best possible action (and hence that we will observe their best possible action). To relax  
 69 this assumption, we also consider the following weaker version of contextual recommendation we  
 70 call *local contextual recommendation*.

71 In this problem, the learner again recommends a set of at most  $L$  actions to the learner (for some  
 72  $L > 1$ )<sup>1</sup>. The user then chooses an action which is at least as good as the best action in our list, and  
 73 we observe this action. In other words, we assume the learner at least looks at all the options we offer,  
 74 so if they choose an external option, it must be better than any offered option (but not necessarily the  
 75 global optimum). Our regret in this case is the difference between the total utility of a learner that  
 76 always follows the best recommendation in our list and the total utility of a learner that always plays  
 77 their optimal action<sup>2</sup>.

78 Let  $A = \max_t |\mathcal{X}_t|$  be a bound on the total number of actions offered in any round, and let  $\gamma =$   
 79  $A/(L - 1)$ . Via a simple reduction to contextual recommendation, we construct algorithms for

<sup>1</sup>Unlike in the previous two variants, it is important in local contextual recommendation that  $L > 1$ ; if  $L = 1$  then the user can simply report the action the learner recommended and the learner receives no meaningful feedback.

<sup>2</sup>In fact, our algorithms all work for a slightly stronger notion of regret, where the benchmark is the utility of a learner that always follows the *first* (i.e. a specifically chosen) recommendation on our list. With this notion of regret, contextual recommendation reduces to local contextual recommendation with  $L = \max |\mathcal{X}_t|$ .

80 local contextual recommendation with regret  $O(\gamma d \log T)$  and  $\gamma \exp(O(d \log d))$ . We further show  
 81 that the first bound is “nearly tight” (up to  $\text{poly}(d)$  factors) in some regimes; in particular, we  
 82 demonstrate an instance where  $L = 2$  and  $K = 2^{\Omega(d)}$  where any algorithm must incur regret at least  
 83  $\min(2^{\Omega(d)}, \Omega(T))$  (Theorem 10).

## 84 1.1 Low-regret cutting plane methods and contextual search

85 To design these low-regret algorithms, we reduce the problem of contextual recommendation to a  
 86 geometric online learning problem (potentially of independent interest). We present two different  
 87 (but equivalent) viewpoints on this problem: one motivated by designing separation-oracle-based  
 88 algorithms for convex optimization, and the other by contextual search.

### 89 1.1.1 Separation oracles and cutting-plane methods

90 Separation oracle methods (or “cutting-plane methods”) are an incredibly well-studied class of  
 91 algorithms for linear and convex optimization. For our purposes, it will be convenient to describe  
 92 cutting-plane methods as follows.

93 Let  $B = \{w \in \mathbb{R}^d \mid \|w\| \leq 1\}$  be the unit ball in  $\mathbb{R}^d$ . We are searching for a hidden point  $w^* \in B$ .  
 94 Every round we can choose a point  $p_t \in B$  and submit this point to a *separation oracle*. The  
 95 separation oracle then returns a half-space separating  $p_t$  from  $w^*$ ; in particular, the oracle returns a  
 96 direction  $v_t$  such that  $\langle w^*, v_t \rangle \geq \langle p_t, v_t \rangle$ .

97 Traditionally, cutting-plane algorithms have been developed to minimize the number of calls to the  
 98 separation oracle until the oracle returns a hyperplane that passes within some distance  $\delta$  of  $w^*$ . For  
 99 example, the ellipsoid method (which always queries the center of the currently-maintained ellipse)  
 100 has the guarantee that it makes at most  $O(d^2 \log 1/\delta)$  oracle queries before finding such a hyperplane.

101 In our setting, instead of trying to minimize the number of separation oracle queries before finding  
 102 a “close” hyperplane, we would like to minimize the total (over all  $T$  rounds) distance between the  
 103 returned hyperplanes and the hidden point  $w^*$ . That is, we would like to minimize the expression

$$\text{Reg}' = \sum_{t=1}^T (\langle w^*, v_t \rangle - \langle p_t, v_t \rangle). \quad (2)$$

104 Due to the similarity between (2) and (1), we call this quantity the *regret* of a cutting-plane algorithm.  
 105 We show that, given any low-regret cutting-plane algorithm, there exists a low-regret algorithm for  
 106 contextual recommendation.

107 **Theorem 1** (Restatement of Theorem 4). *Given a low-regret cutting-plane algorithm  $\mathcal{A}$  with regret*  
 108  *$\rho$ , we can construct an  $O(\rho)$ -regret algorithm for contextual recommendation.*

109 This poses a natural question: what regret bounds are possible for cutting-plane methods? One  
 110 might expect guarantees on existing cutting-plane algorithms to transfer over to regret bounds, but  
 111 interestingly, this does not appear to be the case. In particular, most existing cutting-plane methods  
 112 and analysis suffers from the following drawback: even if the method is likely to find a hyperplane  
 113 within distance  $\delta$  relatively quickly, there is no guarantee that subsequent calls to the oracle will  
 114 return low-regret hyperplanes.

115 In this paper, we will show how to design low-regret cutting-plane methods. Although our final  
 116 algorithms will bear some resemblance to existing cutting-plane algorithms (e.g. some involve cutting  
 117 through the center-of-gravity of some convex set), our analysis will instead build off more recent  
 118 work on the problem of *contextual search*.

### 119 1.1.2 Contextual search

120 Contextual search is an online learning problem initially motivated by applications in pricing [16].  
 121 The basic form of contextual search can be described as follows. As with the previously mentioned  
 122 problems, there is a hidden vector  $w^* \in [0, 1]^d$  that we wish to learn over time. Every round the  
 123 adversary provides the learner with a vector  $v_t$  (the “context”). In response, the learner must guess  
 124 the value of  $\langle v_t, w^* \rangle$ , submitting a guess  $y_t$ . The learner then incurs a loss of  $|\langle v_t, w^* \rangle - y_t|$  (the

distance between their guess and the true value of the inner product), but only learns whether  $\langle v_t, w^* \rangle$  is larger or smaller than their guess.

The problem of designing low-regret cutting plane methods can be interpreted as a “context-free” variant of contextual search. In this variant, the learner is no longer provided the context  $v_t$  at the beginning of each round, and instead of guessing the value of  $\langle v_t, w^* \rangle$ , they are told to directly submit a guess  $p_t$  for the point  $w^*$ . The context  $v_t$  is then revealed to them *after* they submit their guess, where they are then told whether  $\langle p_t, w^* \rangle$  is larger or smaller than  $\langle v_t, w^* \rangle$  and incur loss  $|\langle v_t, w^* \rangle - \langle p_t, w^* \rangle|$ . Note that this directly corresponds to querying a separation oracle with the point  $p_t$ , and the separation oracle returning either the halfspace  $v_t$  (in the case that  $\langle w^*, v_t \rangle \geq \langle w^*, p_t \rangle$ ) or the halfspace  $-v_t$  (in the case that  $\langle w^*, v_t \rangle \leq \langle w^*, p_t \rangle$ ).

One advantage of this formulation is that (unlike in standard analyses of cutting-plane methods) the total loss in contextual search directly matches the expression in (2) for the regret of a cutting-plane method. In fact, were there to already exist an algorithm for contextual search which operated in the above manner – guessing  $\langle v_t, w^* \rangle$  by first approximating  $w^*$  and then computing the inner product – we could just apply this algorithm verbatim and get a cutting-plane method with the same regret bound. Unfortunately, both the algorithms of [19] and [16] explicitly require knowledge of the direction  $v_t$ .

This formulation also raises an interesting subtlety in the power of the separation oracle: specifically, whether the direction  $v_t$  is fixed (up to sign) ahead of time or is allowed to depend on the point  $p$ . Specifically, we consider two different classes of separation oracles. For *(strong) separation oracles*, the direction  $v_t$  is allowed to freely depend on the point  $p_t$  (as long as it is indeed true that  $\langle w^*, v_t \rangle \geq \langle p_t, v_t \rangle$ ). For *weak separation oracles*, the adversary fixes a direction  $u_t$  at the beginning of the round, and then returns either  $v_t = u_t$  or  $v_t = -u_t$  (depending on the sign of  $\langle w^* - p_t, u_t \rangle$ ). The strong variant is most natural when comparing to standard separation oracle guarantees (and is necessary for the reduction in Theorem 1), but for many standalone applications (especially those motivated by contextual search) the weak variant suffices. In addition, the same techniques we use to construct a cutting-plane algorithm for weak separation oracles will let us design low-regret algorithms for list contextual recommendation.

## 1.2 Our results and techniques

We design the following low-regret cutting-plane algorithms:

1. An  $\exp(O(d \log d))$ -regret cutting-plane algorithm for strong separation oracles.
2. An  $O(d \log T)$ -regret cutting-plane algorithm for strong separation oracles.
3. An  $O(\text{poly}(d))$ -regret cutting-plane algorithm for weak separation oracles.

All three algorithms are efficiently implementable (in  $\text{poly}(d, T)$  time). Through Theorem 1, points (1) and (2) immediately imply the algorithms with regret  $\exp(O(d))$  and  $O(d \log T)$  for contextual recommendation. Although we do not have a blackbox reduction from weak separation oracles to algorithms for list contextual recommendation, we show how to apply the same ideas in the algorithm in point (3) to construct an  $O(d^2 \log d)$ -regret algorithm for list contextual recommendation with  $L = \text{poly}(d)$ .

To understand how these algorithms work, it is useful to have a high-level understanding of the algorithm of [19] for contextual search. That algorithm relies on a multiscale potential function the authors call the *Steiner potential*. The Steiner potential at scale  $r$  is given by the expression  $\text{Vol}(K_t + rB)$ , where  $K_t$  (the “knowledge set”) is the current set of possibilities for the hidden point  $w^*$ ,  $B$  is the unit ball, and addition denotes Minkowski sum; in other words, this is the volume of the set of points within distance  $r$  of  $K_t$ . The authors show that by choosing their guess  $y_t$  carefully, they can decrease the  $r$ -scale Steiner potential (for some  $r$  roughly proportional to the width of  $K_t$  in the current direction  $v_t$ ) by a constant factor. In particular, they show that this is achieved by choosing  $y_t$  so to divide the expanded set  $K_t + rB$  exactly in half by volume. Since the Steiner potential at scale  $r$  is bounded below by  $\text{Vol}(rB)$ , this allows the authors to bound the total number of mistakes at this scale. (A more detailed description of this algorithm is provided in Section 2.2).

In the separation oracle setting, we do not know  $v_t$  ahead of time, and thus cannot implement this algorithm as written. For example, we cannot guarantee our hyperplane splits  $K_t + rB$  exactly in half. We partially work around this by using (approximate variants of) Grunbaum’s theorem, which

178 guarantees that any hyperplane through the center-of-gravity of a convex set splits that convex set  
 179 into two pieces of roughly comparable volume. In other words, everywhere where the contextual  
 180 search algorithm divides the volume of  $K_t + rB$  in half, Grunbaum’s theorem implies we obtain  
 181 comparable results by choosing any hyperplane passing through the center-of-gravity of  $K_t + rB$ .

182 Unfortunately, we still cannot quite implement this in the separation oracle setting, since the choice  
 183 of  $r$  in the contextual search algorithm depends on the input vector  $v_t$ . Nonetheless, by modifying  
 184 the analysis of contextual search we can still get some guarantees via simple methods of this form. In  
 185 particular we show that always querying the center-of-gravity of  $K_t$  (alternatively, the center of the  
 186 John ellipsoid of  $K_t$ ) results in an  $\exp(O(d \log d))$ -regret cutting-plane algorithm, and that always  
 187 querying the center of gravity of  $K_t + \frac{1}{T}B$  results in an  $O(d \log T)$ -regret cutting-plane algorithm.

188 Our cutting-plane algorithm for weak separation oracles requires a more nuanced understanding of  
 189 the family of sets of the form  $K_t + rB$ . This family of sets has a number of surprising algebraic  
 190 properties. One such property (famous in convex geometry and used extensively in earlier algorithms  
 191 for contextual search) is *Steiner’s formula*, which states that for any convex  $K$ ,  $\text{Vol}(K + rB)$  is  
 192 actually a polynomial in  $r$  with nonnegative coefficients. These coefficients are called *intrinsic*  
 193 *volumes* and capture various geometric measures of the set  $K$  (including the volume and surface area  
 194 of  $K$ ).

195 There exists a lesser-known analogue of Steiner’s formula for the center-of-gravity of  $K + rB$ ,  
 196 which states that each coordinate of  $\text{cg}(K + rB)$  is a rational function of degree at most  $d$ ; in other  
 197 words, the curve  $\text{cg}(K + rB)$  for  $r \in [0, \infty)$  is a rational curve. Moreover, this variant of Steiner’s  
 198 formula states that each point  $\text{cg}(K + rB)$  can be written as a convex combination of  $d + 1$  points  
 199 contained within  $K$  known as the *curvature centroids* of  $K$ . Motivated by this, we call the curve  
 200  $\rho_K(r) = \text{cg}(K + rB)$  the *curvature path* of  $K$ .

201 Since the curvature path  $\rho_K$  is both bounded in algebraic degree and bounded in space (having to lie  
 202 within the convex hull of the curvature centers), we can bound the total length of the curvature path  
 203  $\rho_K$  by a polynomial in  $d$  (since it is bounded in degree, each component function of  $\rho_K$  can switch  
 204 from increasing to decreasing a bounded number of times). This means that we can discretize the  
 205 curvature path to within precision  $\varepsilon$  while only using  $\text{poly}(d)/\varepsilon$  points on the path.

206 Our algorithms against weak separation oracles and for list contextual recommendation both make  
 207 extensive use of such a discretization. For example, we show that in order to construct a low-regret  
 208 algorithm against a weak separation oracle, it suffices to discretize  $\rho_{K_t}$  into  $O(d^4)$  points and then  
 209 query a random point; with probability at least  $O(d^{-4})$ , we will closely enough approximate the point  
 210  $\rho(r) = \text{cg}(K + rB)$  that our above analogue of contextual search would have queried. We show this  
 211 results in  $\text{poly}(d)$  total regret<sup>3</sup>. A similar strategy works for list contextual recommendation: there  
 212 we discretize the curvature path for the knowledge set  $K_t$  into  $\text{poly}(d)$  candidate values for  $w^*$ , and  
 213 then submit as our set of actions the best response for each of these candidates.

### 214 1.3 Related work

215 There is a very large body of work on recommender systems which employs a wide range of different  
 216 techniques – for an overview, see the survey by Bobadilla et al. [5]. Our formulation in this paper is  
 217 closest to treatments of recommender systems which formulate the problem as an online learning  
 218 problem and attack it with tools such as contextual bandits or reinforcement learning. Some examples  
 219 of such approaches can be seen in [17, 18, 23, 25, 26]. Similarly, there is a wide variety of work on  
 220 online shortest path routing [3, 11, 12, 15, 24, 28] which also applies tools from online learning. One  
 221 major difference between these works and the setting we study in our paper is that these settings  
 222 often rely on some quantitative feedback regarding the quality of item recommended. In contrast,  
 223 our paper only relies on qualitative feedback of the form “action  $x$  is the best action this round” or  
 224 “action  $x$  is at least as good as any action recommended”.

225 One setting in the bandits literature that also possesses qualitative feedback is the setting of Duelling  
 226 Bandits [27]. In this model, the learner can submit a pair of actions and the feedback is a noisy bit  
 227 signalling which action is better. However, their notion of regret (essentially, the probability the best  
 228 arm would be preferred over the arms chosen by the learner) significantly differs from the notion of

<sup>3</sup>The reason this type of algorithm does not work against strong separation oracles is that each point in this discretization could return a different direction  $v_t$ , in turn corresponding to a different value of  $r$

229 regret we measure in our setting (the loss to the user by following our recommendations instead of  
230 choosing the optimal actions).

231 Cutting-plane methods have a long and storied history in convex optimization. The very first efficient  
232 algorithms for linear programming (based on the ellipsoid method [10, 14]). Since then, there has  
233 been much progress in designing more efficient cutting-plane methods (e.g. [6]), but the focus remains  
234 on the number of calls to the separating oracle or the total running time of the algorithm. We are not  
235 aware of any work which studies cutting-plane methods under the notion of regret that we introduce  
236 in Section 1.1.

237 Contextual search was first introduced in the form described in Section 2.2 in [16], where the authors  
238 gave the first time-horizon-independent regret bound of  $O(\text{poly}(d))$  for this problem (earlier work  
239 by [20] and [9] indirectly implied bounds of  $O(\text{poly}(d) \log T)$  for this problem). This was later  
240 improved by [19] to a near-optimal  $O(d \log d)$  regret bound. The algorithms of both [16, 19] rely  
241 on techniques from integral geometry, and specifically on understanding the intrinsic volumes and  
242 Steiner polynomial of the set of possible values for  $w^*$ . Some related geometric techniques have been  
243 used in recent work on the convex body chasing problem[1, 7, 22]. To our knowledge, our paper is  
244 the first paper to employ the fact that the curvature path  $\text{cg}(K + rB)$  is a bounded rational curve (and  
245 thus can be efficiently discretized) in the development of algorithms.

## 246 2 Model and preliminaries

247 We begin by briefly reviewing the problems of contextual recommendation and designing low-regret  
248 cutting plane algorithms. In all of the below problems,  $B = \{w \in \mathbb{R}^d \mid \|w\|_2 \leq 1\}$  is the ball of  
249 radius 1 (and generally, all vectors we consider will be bounded to lie in this ball).

250 **Contextual recommendation.** In *contextual recommendation* there is a hidden point  $w^* \in B$ .  
251 Each round  $t$  (for  $T$  rounds) we are given a set of possible actions  $\mathcal{X}_t \subseteq B$ . If we choose  
252 action  $x_t \in \mathcal{X}_t$  we obtain reward  $\langle x_t, w^* \rangle$  (but do not learn this value). Our feedback is  
253  $x_t^* = \arg \max_{x \in \mathcal{X}_t} \langle x, w^* \rangle$ , the identity of the best action<sup>4</sup>. Our goal is to minimize the total  
254 expected regret  $\mathbb{E}[\text{Reg}] = \mathbb{E} \left[ \sum_{t=1}^T \langle x_t^* - x_t, w^* \rangle \right]$ . Note that since the feedback is deterministic,  
255 this expectation is only over the randomness of the learner’s algorithm.

It will be useful to establish some additional notation for discussing algorithms for contextual  
recommendation. We define the *knowledge set*  $K_t$  to be the set of possible values for  $w^*$  given the  
knowledge we have obtained by round  $t$ . Note that the knowledge set  $K_t$  is always convex, since  
the feedback we receive each round (that  $\langle x^*, w^* \rangle \geq \langle x, w^* \rangle$  for all  $x \in \mathcal{X}_t$ ) can be written as an  
intersection of several halfspaces (and the initial knowledge set  $K_1 = B$  is convex). In fact, we can  
say more. Given a  $w \in K_t$ , let

$$\text{BR}_t(w) = \arg \max_{x \in \mathcal{X}_t} \langle x, w \rangle$$

be the set of optimal actions in  $\mathcal{X}_t$  if the hidden point was  $w$ . We can then partition  $K_t$  into several  
convex subregions based on the value of  $\text{BR}_t(w)$ ; specifically, let

$$R_t(x) = \{w \in K_t \mid x \in \text{BR}_t(w)\}$$

256 be the region of  $K_t$  where  $x$  is the optimal action to play in response. Then:

- 257 1. Each  $R_t(x)$  is a convex subset of  $K_t$ .
- 258 2. The regions  $R_t(x)$  have disjoint interiors and partition  $K_t$ .
- 259 3.  $K_{t+1}$  will equal the region  $R_t(x^*)$  (where  $x^* \in \text{BR}_t(w^*)$  is the optimal action returned as  
260 feedback).

261 We also consider two other variants of contextual recommendation in this paper (*list contextual*  
262 *recommendation* and *local contextual recommendation*). We will formally define them as they arise  
263 (in Sections 5 and 6 respectively).

---

<sup>4</sup>If this argmax is multi-valued, the adversary may arbitrarily return any element of this argmax.

264 **Designing low-regret cutting-plane algorithms.** In a *low-regret cutting-plane algorithm*, we  
 265 again have a hidden point  $w^* \in B$ . Each round  $t$  (for  $T$  rounds) we can query a separation oracle  
 266 with a point  $p_t$  in  $B$ . The separation oracle then provides us with an adversarially chosen direction  $v_t$   
 267 (with  $\|v_t\| = 1$ ) that satisfies  $\langle w^*, v_t \rangle \geq \langle p_t, v_t \rangle$ . The regret in round  $t$  is equal to  $\langle w^* - p_t, v_t \rangle$ , and  
 268 our goal is to minimize the total expected regret  $\mathbb{E}[\text{Reg}] = \mathbb{E} \left[ \sum_{t=1}^T \langle w^* - p_t, v_t \rangle \right]$ . Again, since the  
 269 feedback is deterministic, the expectation is only over the randomness of the learner's algorithm.

270 As with contextual recommendation, it will be useful to consider the knowledge set  $K_t$ , consisting of  
 271 possibilities for  $w^*$  which are still feasible by the beginning of round  $t$ . Again as with contextual  
 272 recommendation,  $K_t$  is always convex; here we intersect  $K_t$  with the halfspace provided by the  
 273 separation oracle every round (i.e.  $K_{t+1} = K_t \cap \{w - p_t, v_t\} \geq 0\}$ ).

274 Unless otherwise specified, the separation oracle can arbitrarily choose  $v_t$  as a function of the query  
 275 point  $p_t$ . For obtaining low-regret algorithms for list contextual recommendation, it will be useful  
 276 to consider a variant of this problem where the separation oracle must commit to  $v_t$  (up to sign) at  
 277 the beginning of round  $t$ . Specifically, at the beginning of round  $t$  (before observing the query point  
 278  $p_t$ ), the oracle fixes a direction  $u_t$ . Then, on query  $p_t$ , the separation oracle returns the direction  
 279  $v_t = u_t$  if  $\langle w - p_t, u_t \rangle \geq 0$ , and the direction  $v_t = -u_t$  otherwise. We call such a separation oracle  
 280 a *weak separation oracle*; an algorithm that only works against such separation oracles is a *low-regret*  
 281 *cutting-plane algorithm for weak separation oracles*. Note that this distinction only matters when the  
 282 learner is using a randomized algorithm; if the learner is deterministic, the adversary can predict all  
 283 the directions  $v_t$  in advance.

## 284 2.1 Convex geometry preliminaries and notation

285 We will denote by  $\text{Conv}_d$  the collection of all convex bodies in  $\mathbb{R}^d$ . Given a convex body  $K \in \text{Conv}_d$ ,  
 286 we will use  $\text{Vol}(K) = \int_K 1 dx$  to denote its volume (the standard Lebesgue measure). Given two  
 287 sets  $K$  and  $L$  in  $\mathbb{R}^d$ , their Minkowski sum is given by  $K + L = \{x + y; x \in K, y \in L\}$ . Let  $B^d$   
 288 denote the unit ball in  $\mathbb{R}^d$ , let  $\mathbb{S}^{d-1} = \{x \in \mathbb{R}^d; \|x\|_2 = 1\}$  denote the unit sphere in  $\mathbb{R}^d$  and let  
 289  $\kappa_d = \text{Vol}(B^d)$  be the volume of the  $d$ -th dimensional unit ball. When clear from context, we will  
 290 omit the superscripts on  $B^d$  and  $\mathbb{S}^{d-1}$ .

We will write  $\text{cg}(K) = (\int_K x dx) / (\int_K 1 dx)$  to denote the *center of gravity* (alternatively, *centroid*)  
 of  $K$ . Given a direction  $u \in \mathbb{S}^{d-1}$  and convex set  $K \in \text{Conv}_d$  we define the width of  $K$  in the  
 direction  $u$  as:

$$\text{width}(K; u) = \max_{x \in K} \langle u, x \rangle - \min_{x \in K} \langle u, x \rangle$$

291 **Approximate Grunbaum and John's Theorem** Finally, we state two fundamental theorems in  
 292 convex geometry. Grunbaum's Theorem bounds the volume of the convex set in each side of a  
 293 hyperplane passing through the centroid. For our purposes it will be also important to bound a cut  
 294 that passes near, but not exactly at the centroid. The bound given in the following paragraph comes  
 295 from a direct combination of Lemma B.4 and Lemma B.5 in Bubeck et al. [7].

296 We will use the notation  $H_u(p) = \{x \mid \langle x, u \rangle = \langle p, u \rangle\}$  to denote the halfspace passing through  $p$   
 297 with normal vector  $u$ . Similarly, we let  $H_u^+(p) = \{x \mid \langle x, u \rangle \geq \langle p, u \rangle\}$ .

298 **Theorem 2** (Approximate Grunbaum [4, 7]). *Let  $K \in \text{Conv}_d$ ,  $c = \text{cg}(K)$  and  $u \in \mathbb{S}^{d-1}$ . Then*  
 299 *consider the semi-space  $H_+ = \{x \in \mathbb{R}^d; \langle u, x - c \rangle \geq t\}$  for some  $t \in \mathbb{R}_+$ . Then:*

$$\frac{\text{Vol}(K \cap H_+)}{\text{Vol}(K)} \geq \frac{1}{e} - \frac{2t(d+1)}{\text{width}(K; u)}$$

300 John's theorem shows that for any convex set  $K \in \text{Conv}_d$ , we can find an ellipsoid  $E$  contained in  $K$   
 301 such that  $K$  is contained in (some translate of) a dilation of  $E$  by a factor of  $d$ .

**Theorem 3** (John's Theorem). *Given  $K \in \text{Conv}_d$ , there is a point  $q \in K$  and an invertible linear*  
*transformation  $A : \mathbb{R}^d \rightarrow \mathbb{R}^d$  such that*

$$q + B \subseteq A(K) \subseteq q + dB.$$

302 We call the ellipsoid  $E = A^{-1}(q + B)$  in Theorem 3 the *John ellipsoid* of  $K$ .

## 2.2 Contextual search

In this section, we briefly sketch the algorithm and analysis of [19] for the standard contextual search problem. We will never use this algorithm directly, but many pieces of the analysis will prove useful in our constructions of low-regret cutting-plane algorithms.

Recall that in contextual search, each round the learner is given a direction  $v_t$ . The learner is trying to learn the location of a hidden point  $w^*$ , and at time  $t$  has narrowed down the possibilities of  $w^*$  to a knowledge set  $K_t$ . The algorithm of [19] runs the following steps:

1. Compute the width  $w = \text{width}(K_t; v_t)$  of  $K_t$  in the direction  $v_t$ . Let  $r = 2^{\lceil \lg(w/10d) \rceil}$  (rounding  $w/10d$  to a nearby power of two).
2. Consider the set  $\tilde{K} = K_t + rB$ . Choose  $y_t$  so that the hyperplane  $H = \{w \mid \langle v_t, w \rangle = y_t\}$  divides the set  $\tilde{K}$  into two pieces of equal volume.

We can understand this algorithm as follows. Classic cutting-plane methods try to decrease  $\text{Vol}(K_t)$  by a constant factor every round (arguing that this decrease can only happen so often before one of our hyperplanes passes within some small distance to our feasible region). The above algorithm can be thought of as a multi-scale variant of this approach: they show that if we incur loss  $w \approx dr$  in a round (since loss in a round is at most the width), the potential function  $\text{Vol}(K_t + rB)$  must decrease by a constant factor. Since  $\text{Vol}(K_t + rB) \geq \text{Vol}(rB) = r^d \kappa_d$ , we can incur a loss of this size at most  $O(d \log(2/r))$  times. Summing over all possible discretized values of  $r$  (i.e. powers of 2 less than 1), we arrive at an  $O(d \log d)$  regret bound.

There is one important subtlety in the above argument: if we let  $H^+ = \{w \mid \langle v_t, w \rangle \geq y_t\}$  be the halfspace defined by  $H$ , the two sets  $(K_t \cap H^+) + rB$  and  $(K_t + rB) \cap H^+$  are *not* equal. The volume of the first set represents the new value of our potential (i.e.  $\text{Vol}(K_{t+1} + rB)$ ), but it is the second set that has volume equal to half our current potential (i.e.  $\frac{1}{2} \text{Vol}(K_t + rB)$ ).

Luckily, our choice of  $r$  allows us to relate these two quantities in a way so that our original argument works. Let  $H$  divide  $K$  into  $K^+$  and  $K^-$ . Note that  $\text{Vol}(K^+ + rB) + \text{Vol}(K^- + rB) = \text{Vol}(K + rB) + \text{Vol}((K \cap H) + rB)$  (in particular,  $K + rB$  and  $(K \cap H) + rB$  are the union and intersection respectively of  $K^+ + rB$  and  $K^- + rB$ ). Since  $\text{Vol}(K^+ + rB) = \text{Vol}(K^- + rB)$ , to bound  $\text{Vol}(K^+ + rB)/\text{Vol}(K + rB)$  it suffices to bound  $\text{Vol}((K \cap H) + rB)$ . We do so in the following lemma (which will also prove useful to us in later analysis).

**Lemma 1.** *Given  $K \in \text{Conv}_d$  and  $u \in \mathbb{S}^{d-1}$ , let  $H$  be a hyperplane of the form  $\{w \mid \langle w, u \rangle = b\}$  (for some  $b \in \mathbb{R}$ ). Then:*

$$\text{Vol}((K \cap H) + rB) \leq \left( \frac{2rd}{\text{width}(K; u)} \right) \cdot \text{Vol}(K + rB)$$

*Proof.* Let  $\bar{V} = \text{Vol}_{d-1}((K + rB) \cap H)$  be the volume of the  $(d-1)$ -dimensional cross-section of  $K + rB$  carved out by  $H$ . Note first that we can write any point in  $(K \cap H) + rB$  in the form  $w + \lambda u$ , where  $w \in (K + rB) \cap H$  and  $\lambda \in [-r, r]$ . It follows that

$$\text{Vol}((K \cap H) + rB) \leq 2r\bar{V}. \tag{3}$$

We will now bound  $\bar{V}$ . Let  $\bar{K} = (K + rB) \cap H$ . Let  $p^+$  be the point in  $K + rB$  maximizing  $\langle u, p \rangle$ , and let  $p^-$  be the point in  $K + rB$  minimizing  $\langle u, p \rangle$  (so  $p^-$  and  $p^+$  certify the width). Consider the cones  $C^-$  and  $C^+$  formed by taking the convex hull  $\text{Conv}(p^-, \bar{K})$  and  $\text{Conv}(p^+, \bar{K})$  respectively.  $C^-$  and  $C^+$  are disjoint and contained within  $K + rB$ , so

$$\text{Vol}(C^-) + \text{Vol}(C^+) \leq \text{Vol}(K + rB).$$

But now note that by the formula for the volume of a cone,

$$\text{Vol}(C^-) + \text{Vol}(C^+) = \frac{1}{d} \cdot \text{width}(K + rB; u) \cdot \text{Vol}_{d-1}(\bar{K}) \geq \frac{\text{width}(K; u)}{d} \cdot \bar{V}.$$

It follows that

$$\bar{V} \leq \frac{d}{\text{width}(K; u)} \text{Vol}(K + rB). \quad (4)$$

Substituting this into (3), we arrive at the theorem statement.  $\square$

This lemma allows us to conclude our analysis of the contextual search algorithm. In particular, since we have chosen  $r \approx \text{width}(K, v_t)/10d$ , by applying this lemma we can see that in our analysis of contextual search,  $\text{Vol}((K \cap H) + rB) \leq 0.2\text{Vol}(K + rB)$ , from which it follows that  $\text{Vol}(K^+ + rB)/\text{Vol}(K + rB) \leq 0.6$ .

### 3 From Cutting-Plane Algorithms to Contextual Recommendation

We begin by proving a reduction from designing low-regret cutting plane algorithms to contextual recommendation. Specifically, we will show that given a regret  $\rho$  cutting-plane algorithm, we can use it to construct an  $O(\rho)$ -regret algorithm for contextual recommendation.

Note that while these two problems are similar in many ways (e.g. they both involve searching for an unknown point  $w^*$ ), they are not completely identical. Among other things, the formulation of regret although similar is qualitatively different between the two problems (i.e. between expressions (1) and (2)). In particular, in contextual recommendation, the regret each round is  $\langle x_t^* - x_t, w^* \rangle$ , whereas for cutting-plane algorithms, the regret is given by  $\langle w^* - p_t, v_t \rangle$ . Nonetheless, we will be able to relate these two notions of regret by considering a separation oracle that always returns a halfspace in the direction of  $x_t^* - x_t$ . We present this reduction below.

**Theorem 4.** *Given a low-regret cutting-plane algorithm  $\mathcal{A}$  with regret  $\rho$ , we can construct an  $O(\rho)$ -regret algorithm for contextual recommendation.*

*Proof.* We will simultaneously run an instance of  $\mathcal{A}$  with the same hidden vector  $w^*$ . Each round we will ask  $\mathcal{A}$  for its query  $p_t$  to the separation oracle. We will then compute a  $x_t \in \text{BR}_t(p_t)$  (recall that  $\text{BR}_t(w)$  is the optimal action to play if  $w$  is the true hidden vector) and submit  $x_t$  as our action for this round of contextual recommendation. We then receive feedback  $x_t^* \in \text{BR}_t(w^*)$ . Consider the following two cases:

**Case 1:** If  $x_t^* = x_t$ , then our contextual recommendation algorithm incurs zero regret since we successfully chose the optimal point. In this case we ignore this round for  $\mathcal{A}$  (i.e. we reset its state to its state at the beginning of round  $t$ ).

**Case 2:** If  $x_t^* \neq x_t$ , let  $v_t = (x_t^* - x_t)/\|x_t^* - x_t\|$ . We will return  $v_t$  to  $\mathcal{A}$  as the separation oracle's answer to query  $p_t$ . Note that this is a valid answer, since

$$\langle w^* - p_t, v_t \rangle = \frac{1}{\|x_t^* - x_t\|} (\langle w^*, x_t^* - x_t \rangle + \langle p_t, x_t - x_t^* \rangle) \geq \frac{1}{\|x_t^* - x_t\|} \langle w^*, x_t^* - x_t \rangle. \quad (5)$$

Here the final inequality holds since (by the definition of  $\text{BR}_t(p_t)$ )  $\langle p_t, x_t \rangle \geq \langle p_t, x \rangle$  for any  $x \in \mathcal{X}_t$ . The RHS of (5) is in turn larger than zero, since  $\langle w^*, x_t^* \rangle \geq \langle w^*, x \rangle$  for any  $x \in \mathcal{X}_t$  (and thus this is a valid answer to the separation oracle). Moreover, note that the regret we incur under contextual recommendation is exactly  $\langle w^*, x_t^* - x_t \rangle$ , so by rearranging equation (5), we have that:

$$\langle w^*, x_t^* - x_t \rangle \leq \|x_t^* - x_t\| \langle w^* - p_t, v_t \rangle \leq 2 \langle w^* - p_t, v_t \rangle.$$

It follows that the total regret of our algorithm for contextual recommendation is at most twice that of  $\mathcal{A}$ . Our regret is thus bounded above by  $2\rho$ , as desired.  $\square$

Note that the reduction in Theorem 4 is efficient as long as we have an efficient method for optimizing a linear function over  $\mathcal{X}_t$  (i.e. for computing  $\text{BR}_t(w)$ ). In particular, this means that this reduction

378 can be practical even in settings where  $\mathcal{X}_t$  may be combinatorially large (e.g. the set of  $s$ - $t$  paths in  
379 some graph).

380 Note also that this reduction *does not* work if  $\mathcal{A}$  is only low-regret against weak separation oracles.  
381 This is since the direction  $v_t$  we choose does depend non-trivially on the point  $p_t$  (in particular, we  
382 choose  $x_t \in \text{BR}_t(p_t)$ ). Later in Section 5.3, we will see how to use ideas from designing cutting-  
383 plane methods for weak separation oracles to construct low-regret algorithms for *list* contextual  
384 recommendation – however we do not have a black-box reduction in that case, and our construction  
385 will be more involved.

## 386 4 Designing Low-Regret Cutting-Plane Algorithms

387 In this section we will describe how to construct low-regret cutting-plane algorithms for strong  
388 separation oracles.

### 389 4.1 An $\exp(O(d \log d))$ -regret cutting-plane algorithm

390 We begin with a quick proof that always querying the center of the John ellipsoid of  $K_t$  leads to  
391 a  $\exp(O(d \log d))$ -regret cutting-plane algorithm. Interestingly, although this corresponds to the  
392 classical ellipsoid algorithm, our analysis will instead proceed along the lines of the analysis of the  
393 contextual search algorithm summarized in Section 2.2.

394 We will need the following lemma.

395 **Lemma 2.** *Let  $K \in \text{Conv}_d$  be an arbitrary convex set and let  $r \geq 0$ . Let  $E$  be the John ellipsoid of  
396  $K$ , and let  $H$  be a hyperplane that passes through the center of  $E$ , dividing  $K$  into two regions  $K^+$   
397 and  $K^-$ . Then*

$$\text{Vol}(K^+ + rB) \leq \left(1 - \frac{1}{10d^d}\right) (\text{Vol}(K^+ + rB) + \text{Vol}(K^- + rB))$$

398 *Proof.* Let  $H$  divide  $E$  into the two regions  $E^+$  and  $E^-$  analogously to how it divides  $K$  into  $K^+$   
399 and  $K^-$ . Note that since  $E \subseteq K \subseteq dE$  (translating  $K$  so that  $E$  is centered at the origin), we can  
400 write:

$$\frac{\text{Vol}(K^- + rB)}{\text{Vol}(K + rB)} \geq \frac{\text{Vol}(E^- + rB)}{\text{Vol}(dE + rB)} \geq \frac{0.5 \cdot \text{Vol}(E + rB)}{\text{Vol}(dE + rB)} \geq \frac{1}{2d^d} \frac{\text{Vol}(E + rB)}{\text{Vol}(E + (r/d)B)} \geq \frac{1}{2d^d}. \quad (6)$$

401 On the other hand, by monotonicity we also have that

$$\frac{\text{Vol}(K^+ + rB)}{\text{Vol}(K + rB)} \leq 1.$$

402 It follows that

$$\text{Vol}(K^+ + rB) / \text{Vol}(K^- + rB) \leq 2d^d.$$

403 The conclusion then follows since

$$2d^d \leq \left(1 - \frac{1}{10d^d}\right) (2d^d + 1).$$

404 □

405 We can now modify the analysis of contextual search to make use of Lemma 2. In particular, we  
406 will show that for each round  $t$ , there's some  $r$  (roughly proportional to the current width) where  
407  $\text{Vol}(K_t + rB)$  decreases by a multiplicative factor of  $(1 - d^{-O(d)})$ .

408 **Theorem 5.** *The cutting-plane algorithm which always queries the center of the John ellipsoid of*  
 409  *$K_t$  incurs  $\exp(O(d \log d))$  regret.*

410 *Proof.* Fix a round  $t$ , and let  $K = K_t$  be the knowledge set at time  $t$ . Let  $E$  be the John ellipsoid of  
 411  $K$  and let  $p_t$  be the center of  $E$ . When we query the separation oracle with  $p_t$ , we get a hyperplane  
 412  $H$  (defined by  $v_t$ ) that passes through  $p_t$  and divides  $K$  into  $K^+ = K_{t+1}$  and  $K^- = K \setminus K_{t+1}$ .

413 By Lemma 2, for any  $r \geq 0$ , we have that

$$\text{Vol}(K^+ + rB) \leq \left(1 - \frac{1}{10d^d}\right) (\text{Vol}(K^+ + rB) + \text{Vol}(K^- + rB))$$

414 Note that (as in Section 2.2),  $\text{Vol}(K^+ + rB) + \text{Vol}(K^- + rB) = \text{Vol}(K + rB) + \text{Vol}((K \cap H) + rB)$ .  
 415 By Lemma 1, we have that

$$\text{Vol}((K \cap H) + rB) \leq \frac{2rd}{\text{width}(K; v_t)} \cdot \text{Vol}(K + rB),$$

416 and thus that

$$\text{Vol}(K^+ + rB) \leq \left(1 - \frac{1}{10d^d}\right) \left(1 + \frac{2dr}{\text{width}(K; v_t)}\right) \text{Vol}(K + rB)$$

417 In particular, if we choose  $r \leq \text{width}(K; v_t)/(100d^{d+1})$ , then

$$\text{Vol}(K^+ + rB) \leq \left(1 - \frac{1}{20d^d}\right) \text{Vol}(K + rB).$$

418 The analysis now proceeds as follows. In each round, let  $r = 2^{\lfloor \lg(\text{width}(K; v_t)/100d^{d+1}) \rfloor}$  be the largest  
 419 power of 2 smaller than  $w/(100d^{d+1})$ . Any specific  $r$  can occur in at most

$$\frac{\log(\text{Vol}(K_0 + rB)/\text{Vol}(K_T + rB))}{\log(1 - \frac{1}{20d^d})}$$

420 rounds. This in turn is at most

$$\frac{\log(\text{Vol}(2B)/\text{Vol}(rB))}{1/(20d^d)} \leq 20d^{d+1} \log(2/r)$$

421 rounds, and in each such round the regret that round is at most  $\text{width}(K; v_t) \leq 200d^{d+1}r$ . The total  
 422 regret from such rounds is therefore at most

$$20d^{d+1} \log(2/r) \cdot 200d^{d+1}r = O(d^{2(d+1)}r \log(2/r)).$$

423 Now, by our discretization,  $r$  is a power of two less than 1. Note that  $\sum_{i=0}^{\infty} 2^{-i} \log(2/2^{-i}) =$   
 424  $O(\sum_{i=0}^{\infty} 2^{-i} i) = O(1)$ . It follows that the total regret over all rounds is at most  $O(d^{2(d+1)}) =$   
 425  $\exp(O(d \log d))$ , as desired.  $\square$

426 The remaining algorithms we study will generally query the center-of-gravity of some convex set, as  
 427 opposed to the center of the John ellipsoid. This leads to the following natural question: what is the  
 428 regret of the cutting-plane algorithm which always queries the center-of-gravity of  $K_t$ ?

429 Kannan, Lovasz, and Simonovits (Theorem 4.1 of [13]) show that it is possible to choose an ellipsoid  
 430  $E$  satisfying  $E \subseteq K \subseteq dE$  such that  $E$  is centered at  $\text{cg}(K)$ , so our proof of Theorem 5 shows  
 431 that this algorithm is also an  $\exp(O(d \log d))$  algorithm. However, for both this algorithm and the  
 432 ellipsoid algorithm of Theorem 5, we have no non-trivial lower bound on the regret. It is an interesting  
 433 open question to understand what regret these algorithms actually obtain (for example, do either of  
 434 these algorithms achieve  $\text{poly}(d)$  regret?).

## 4.2 An $O(d \log T)$ -regret cutting-plane algorithm

We will now show how to obtain an  $O(d \log T)$ -regret cutting plane algorithm. Our algorithm will simply query the center-of-gravity of  $K_t + \frac{1}{T}B$  each round. The advantage of doing this is that we will only need to examine one scale of the contextual search potential (namely the value of  $\text{Vol}(K_t + \frac{1}{T}B)$ ). The following geometric lemma shows that, as long as the width of the  $K_t$  is long enough, this potential decreases by a constant fraction each step.

**Lemma 3.** *Given  $K \in \text{Conv}_d$ ,  $u \in \mathbb{S}^{d-1}$  and  $b, r \in \mathbb{R}$  (with  $r \geq 0$ ), let:*

- $c = \text{cg}(K + rB)$  be the center-of-gravity of  $K + rB$ ,
- $H^+(b) = \{x \mid \langle u, x - c \rangle \geq -b\}$  be a half-space induced by a hyperplane in the direction  $u$  passing within distance  $b$  of the point  $c$ , and
- $K^+ = K \cap H^+(b)$  be the intersection of  $K$  with this half-space.

If  $r, |b| \leq \text{width}(K, u)/(16ed)$  then

$$\text{Vol}(K^+ + rB) \leq 0.9 \cdot \text{Vol}(K + rB).$$

*Proof.* Observe that  $K^+ + rB \subseteq (K + rB) \cap H^+(b + r)$ . If we define  $H^-(b + r) = \{x \in \mathbb{R}^d; \langle u, x - c \rangle \leq -(b + r)\}$  then:

$$\text{Vol}(K^+ + rB) \geq \text{Vol}(K + rB) - \text{Vol}((K + rB) \cap H^-(b + r)).$$

By Theorem 2 (Approximate Grunbaum) we have:

$$\frac{\text{Vol}((K + rB) \cap H^-(b + r))}{\text{Vol}(K + rB)} \geq \frac{1}{e} - \frac{2(d+1)}{\text{width}(K; u)} \cdot \frac{2\text{width}(K, u)}{16ed} \geq \frac{1}{2e} \geq 0.1$$

□

We can now prove that the above algorithm achieves  $O(d \log T)$  regret.

**Theorem 6.** *The cutting-plane algorithm which queries the point  $p_t = \text{cg}(K_t + \frac{1}{T}B)$  incurs  $O(d \log T)$  regret.*

*Proof.* We will begin by showing that if we incur more than  $50d/T$  regret in a given round, we reduce the value of  $\text{Vol}(K_t + \frac{1}{T}B)$  by a constant factor. Since  $\text{Vol}(K_t + \frac{1}{T}B)$  is bounded below by  $\text{Vol}(\frac{1}{T}B)$ , this will allow us to bound the number of times we incur a large amount of regret.

Consider a fixed round  $t$  of this algorithm. Let  $K_t$  be the knowledge set at time  $t$ . When we query the separation-oracle point  $p_t = \text{cg}(K_t + \frac{1}{T}B)$ , we obtain a half-space  $H^+ = \{w \in \mathbb{R}^d; \langle w - p, v_t \rangle \geq 0\}$  passing through  $p_t$  which contains  $w^*$ . We update  $K_{t+1} = K_t \cap H^+$

The regret in round  $t$  is bounded by  $\text{width}(K_t, v_t)$ . If the width is at least  $50d/T$  we can then apply Lemma 3 with  $b = 0$  and  $r = 1/T$  to conclude that:

$$\text{Vol}\left(K_{t+1} + \frac{1}{T}B\right) \leq 0.9 \cdot \text{Vol}\left(K_t + \frac{1}{T}B\right). \quad (7)$$

Now, in each round where  $\text{width}(K_t, v_t) < 50d/T$ , we incur at most  $50d/T$  regret, so in total we incur at most  $T \cdot (50d/T) = 50d$  regret from such rounds. On the other hand, in other rounds we may incur up to  $\|w^* - p_t\| \leq 2$  regret per round. However, note that  $\text{Vol}(K_1 + \frac{1}{T}B) = \text{Vol}((1 + \frac{1}{T})B) \leq 2^d \text{Vol}(B)$ , whereas for any  $t$ ,  $\text{Vol}(K_t + \frac{1}{T}B) \geq \text{Vol}(\frac{1}{T}B) = T^{-d} \kappa_d$ . Since in each such round we shrink this quantity by at least a factor of 0.9, it follows that the total number of such rounds is at most  $O(\log(2T^d)) = O(d \log T)$ . It follows that the total regret from such rounds is at most  $O(d \log T)$ , and thus the overall regret of this algorithm is at most  $O(d \log T)$ . □

## 5 List contextual recommendation, weak separation oracles, and the curvature path

In this section, we present two algorithms: 1. a  $\text{poly}(d)$  expected regret cutting-plane algorithm for weak separation oracles, and 2. an  $O(d^2 \log d)$  regret algorithm for list contextual recommendation with list size  $L = \text{poly}(d)$ .

470 The unifying feature of both algorithms is that they both involve analyzing a geometric object we call  
 471 the *curvature path* of a convex body. The *curvature path* of  $K$  is a bounded-degree rational curve  
 472 contained within  $K$  that connects the center-of-gravity  $\text{cg}(K)$  with the Steiner point  $(\lim_{r \rightarrow \infty} \text{cg}(K +$   
 473  $rB))$  of  $K$ .

474 In Section 5.1 we formally define the curvature path and demonstrate how to bound its length. In  
 475 Section 5.2, we show that randomly querying a point on a discretization of the curvature path leads  
 476 to a  $\text{poly}(d)$  regret cutting-plane algorithm for weak separation oracles. Finally, in Section 5.1, we  
 477 show how to transform a discretization of the curvature path of the knowledge set into a list of actions  
 478 for list contextual recommendation, obtaining a low regret algorithm.

## 479 5.1 The curvature path

480 An important fact (driving some of the recent results in contextual search, e.g. [16]) is the fact that the  
 481 volume  $\text{Vol}(K + rB)$  is a  $d$ -dimensional polynomial in  $r$ . This fact is known as the Steiner formula:

$$\text{Vol}(K + rB) = \sum_{i=0}^d V_{d-i}(K) \kappa_i r^i \quad (8)$$

482 After normalization by the volume of the unit ball, the coefficients of this polynomial correspond to  
 483 the *intrinsic volumes* of  $K$ . The intrinsic volumes are a family of  $d + 1$  functionals  $V_i : \text{Conv}_d \rightarrow \mathbb{R}_+$   
 484 for  $i = 0, 1, \dots, d$  that associate for each convex  $K \in \text{Conv}_d$  a non-negative value. Some of these  
 485 functionals have natural interpretations:  $V_d(K)$  is the standard volume  $\text{Vol}(K)$ ,  $V_{d-1}(K)$  is the  
 486 surface area,  $V_1(K)$  is the average width and  $V_0(K)$  is 1 whenever  $K$  is non-empty and 0 otherwise.

487 There is an analogue of the Steiner formula for the centroid of  $K + rB$ , showing that it admits  
 488 a description as a vector-valued rational function. More precisely, there exist  $d + 1$  functions  
 489  $c_i : \text{Conv}_d \rightarrow \mathbb{R}^d$  for  $0 \leq i \leq d$  such that:

$$\text{cg}(K + rB) = \frac{\sum_{i=0}^d V_{d-i}(K) \kappa_i r^i \cdot c_i(K)}{\sum_{i=0}^d V_{d-i}(K) \kappa_i r^i} \quad (9)$$

490 The point  $c_0(K) \in K$  corresponds to the usual centroid  $\text{cg}(K)$  and  $c_d(K)$  corresponds to the Steiner  
 491 point. The functionals  $c_i$  are called *curvature centroids* since they can be computed by integrating a  
 492 certain curvature measures associated with a convex body (a la Gauss-Bonnet). We refer to Section  
 493 5.4 in Schneider [21] for a more thorough discussion. For our purposes, however, the  
 494 only important fact will be that each curvature centroid  $c_i(K)$  is guaranteed to lie within  $K$  (note  
 495 that this is not at all obvious from their definition).

Motivated by this, given a convex body  $K \subseteq \mathbb{R}^d$  we define its *curvature path* to be the following  
 curve in  $\mathbb{R}^d$ :

$$\rho_K : [0, \infty] \rightarrow K \quad \rho_K(r) = \text{cg}(K + rB)$$

496 The path connects the centroid  $\rho_K(0) = \text{cg}(K)$  to the Steiner point  $\rho_K(\infty)$ . Our main result will  
 497 exploit the fact that the coordinates of the curvature path are rational functions of bounded degree to  
 498 produce a discretization. We start by bounding the length of the path. For reasons that will become  
 499 clear, it will be more convenient to bound its length when transformed by the linear map in John's  
 500 Theorem.

501 **Lemma 4.** *Let  $K \in \text{Conv}_d \setminus \{\emptyset\}$ , and let  $A$  be a linear transformation as in (John's) Theorem 3.  
 502 Then the length of the path  $\{A\rho_K(r); r \in [0, \infty]\}$  is at most  $4d^3$ .*

503 *Proof.* The length of a path is the integral of the  $\ell_2$ -norm of its derivative. We will bound the  $\ell_2$  norm  
 504 by the  $\ell_1$  norm and then analyze each of its components.

$$\text{length}(A\rho_K) = \int_0^\infty \|A\rho'_K(r)\|_2 dr \leq \int_0^\infty \|A\rho'_K(r)\|_1 dr = \sum_{i=1}^d \int_0^\infty |(A\rho'_K(r))_i| dr \quad (10)$$

505 where  $(A\rho'_K(r))_i$  is the  $i$ -th component of the vector  $A\rho'_K(r)$ . By equation (9), we know that there  
 506 are degree- $d$  polynomials  $p(r)$  and  $q(r)$  such that  $(A\rho'_K(r))_i = p(r)/q(r)$  where  $q(r) > 0$  for all

507  $r \geq 0$ . Hence we can write its derivative as:  $(A\rho'_K(r))_i = (p'(r)q(r) - p(r)q'(r))/(q(r)^2)$  which  
 508 can be re-written as  $h(r)/q(r)^2$  for a polynomial  $h(r)$  of degree at most  $2d - 1$ . Now a polynomial  
 509 of degree at most  $k$  can change signs at most  $k$  times. So we can partition  $[0, \infty]$  into at most  $2d$   
 510 intervals  $I_1, \dots, I_{2d}$  (some possibly empty) such that the sign of  $(A\rho'_K(r))_i$  is the same within each  
 511 region (treating zeros arbitrarily). If  $I_j = [a_j, b_j]$ , we can then write:

$$\int_0^\infty |(A\rho'_K(r))_i| dr = \sum_{j=1}^{2d} \int_{a_j}^{b_j} |(A\rho'_K(r))_i| = \sum_{i=1}^{2d} |(A\rho_K(b_j))_i - (A\rho_K(a_j))_i| \leq 4d^2 \quad (11)$$

512 where the last step follows from John's theorem. Since  $A(\rho_K)$  is in  $A(K)$  which is contained in a  
 513 ball of radius  $d$ , the distance between the  $i$ -coordinate of two points is at most  $2d$ . Equations (10) and  
 514 (11) together imply the statement of the lemma.  $\square$

**Lemma 5.** *Given  $K \in \text{Conv}_d$  and a discretization parameter  $k$ , there exists a set  $D = \{p_0, p_1, \dots, p_k\} \subset K$  such that for every  $r$  there is a point  $p_i \in D$  such that:*

$$|\langle \rho_K(r) - p_i, u \rangle| \leq \frac{4d^3}{k} \cdot \text{width}(K, u), \quad \forall u \in \mathbb{S}^{d-1}.$$

515 *Proof.* Discretize the path  $A\rho_k$  into  $k$  pieces of equal length and let  $Ap_0, Ap_1, \dots, Ap_k$  correspond  
 516 to the endpoints. Let  $D = \{p_0, p_1, \dots, p_k\}$ . We know by Lemma 4 that for any  $p = \rho_K(r)$ , there  
 517 exists a  $p_i \in D$  such that:  $\|Ap_i - Ap\|_2 \leq 4d^3/k$ .

518 Now, for each unit vector  $u \in \mathbb{S}^{d-1}$ , we have:

$$|\langle u, p_i - p \rangle| \leq \langle A^{-T}u, A(p_i - p) \rangle \leq \|A^{-T}u\| \cdot \|A(p_i - p)\| \leq \|A^{-T}u\| \cdot 4d^3/k$$

Finally, we argue that  $\|A^{-T}u\| \leq \text{width}(K; u)$ . Let  $v = (A^{-T}u)/\|A^{-T}u\|$  and take  $x, y \in K$  that  
 certify the width of  $K$  in direction  $u$ :

$$\text{width}(K, u) = \langle u, x - y \rangle = \langle A^{-T}u, Ax - Ay \rangle = \|A^{-T}u\| \cdot \langle v, Ax - Ay \rangle$$

519 Finally note that  $Ax$  and  $Ay$  are respectively the maximizer and minimizer of  $\langle v, z \rangle$  for  $z \in A(K)$   
 520 since:  $\max_{z \in A(K)} \langle v, z \rangle = \max_{x \in K} \langle v, Ax \rangle = \max_{x \in K} \langle A^T v, x \rangle = \max_{x \in K} \langle u, x \rangle / \|A^{-T}u\|$ .  
 521 This implies that  $\langle v, Ax - Ay \rangle = \text{width}(A(K), v) \geq 1$  by John's Theorem since  $q + B \subseteq A(K)$ .  
 522 This completes the proof.  $\square$

## 5.2 Low-regret cutting-plane algorithms for weak separation oracles

523 In this section we show how to use the discretization of the curvature path in Lemma 5 to construct a  
 524 poly( $d$ )-regret cutting-plane algorithm that works against a weak separation oracle.

525 Recall that a weak separation oracle is a separation oracle that fixes the direction of the output  
 526 hyperplane in advance (up to sign). That is, at the beginning of round  $t$  the oracle fixes some direction  
 527  $v_t \in \mathbb{S}^{d-1}$  and returns either  $v_t$  or  $-v_t$  to the learner depending on the learner's choice of query point  
 528  $q_t$ .

530 One advantage of working with a weak separation oracle is that the width  $\text{width}(K_t; v_t)$  of the  
 531 knowledge set in the direction  $v_t$  is fixed and independent of the query point  $p_t$  of the learner. This  
 532 means that if we can guess the width, we can run essentially the standard contextual search algorithm  
 533 (of Section 2.2) by querying any point  $p_t$  that lies on the hyperplane which decreases the potential  
 534 corresponding to this width by a constant factor. One good way to guess the width turns out to choose  
 535 a random point belonging to a suitably fine discretization of the curvature path.

536 **Theorem 7.** *The cutting-plane algorithm which chooses a random point from the discretization of*  
 537 *the curvature path of  $K_t$  into  $d^4$  pieces achieves a total regret of  $O(d^5 \log^2 d)$  against any weak*  
 538 *separation oracle.*

539 *Proof.* Consider a fixed round  $t$ . Let  $v_t$  be the direction fixed by the weak separation-oracle and let  
 540  $\omega = \text{width}(K_t; v_t)$ . Let  $r = 2^{\lceil \lg(\omega/16ed) \rceil}$  (rounding  $\omega/16ed$  to the nearest power of two).

541 If we could choose the point  $p_t = \rho_{K_t}(r) = \text{cg}(K_t + rB)$ , then by Lemma 3, any separating  
 542 hyperplane through  $p_t$  would decrease this potential by a constant factor. However, we do not know

543  $r$ . Instead, we will choose a random point from the discretization  $D$  of the curvature path of  $K_t$  into  
 544  $O(d^4)$  pieces, and argue that by Lemma 5 one of these points will be close enough to  $\rho_{K_t}(r)$  to make  
 545 the argument go through.

546 Formally, let  $D$  be the discretization of  $\rho_{K_t}$  into  $64ed^4$  pieces as per Lemma 5. By Lemma 5, there  
 547 then exists a point  $p_i \in D$  that satisfies

$$|\langle \rho_K(r) - p_i, v_t \rangle| \leq \frac{1}{16ed} \cdot \text{width}(K_t; v_t). \quad (12)$$

548 Let  $H$  be a hyperplane through  $p_i$  in the direction  $v_t$  (i.e.  $H = \{\langle w - p_i, v_t \rangle = 0\}$ ), and let  $H$  divide  
 549  $K_t$  into the two regions  $K^+$  and  $K^-$ . By Lemma 3 (with  $b = \langle \rho_K(r) - p_i, v_t \rangle$ ), since (12) holds,  
 550 we have that

$$\text{Vol}(K^+ + rB) \leq 0.9 \cdot \text{Vol}(K + rB). \quad (13)$$

551 Now, consider the algorithm which queries a random point in  $D$ . With probability  $1/|D| = \Omega(d^{-4})$ ,  
 552 equation (13) holds. Otherwise, it is still true that  $\text{Vol}(K^+ + rB) \leq \cdot \text{Vol}(K + rB)$ . Therefore in  
 553 expectation,

$$\mathbb{E}[\text{Vol}(K_{t+1} + rB)] \leq (1 - \Omega(d^{-4})) \mathbb{E}[\text{Vol}(K_t + rB)].$$

554 In particular, the total expected number of rounds we can have where  $r = 2^{-i}$  is at most  
 555  $di / \log(1/(1 - \Omega(d^{-4}))) = O(id^5)$ . In such a round, our maximum possible loss is at most  
 556  $\text{width}(K_t; v_t) \leq \min(20dr, 2)$ . Summing over all  $i$  from 0 to  $\infty$ , we arrive at a total regret bound of

$$\sum_{i=0}^{\infty} O(id^5 \min(d2^{-i}, 1)) = \sum_{i=0}^{\log d} O(id^5) + d^6 \sum_{i=\log d}^{\infty} O(i2^{-i}) = O(d^5 \log^2 d).$$

557

□

### 558 5.3 List contextual recommendation

559 In this section, we consider the problem of list contextual recommendation. In this variant of  
 560 contextual recommendation, we are allowed to offer a list of possible actions  $L_t \subseteq \mathcal{X}_t$  and we  
 561 measure regret against the best action in the list:

$$\text{loss}_t = \langle w^*, x_t^* \rangle - \max_{x \in L_t} \langle w^*, x \rangle.$$

562 Our main result is that if the list is allowed to be of size  $O(d^4)$  then it is possible to achieve total  
 563 regret  $O(d^2 \log d)$ .

564 The recommended list of actions will be computed as follows: given the knowledge set  $K_t$ , let  $D$  be  
 565 the discretization of the curvature path with parameter  $k = 200d^4$  obtained in Lemma 5. Then for  
 566 each  $p_i \in D$  find an arbitrary  $x_i \in \text{BR}(p_i) := \arg \max_{x \in \mathcal{X}_t} \langle p_i, x \rangle$  and let  $L_t = \{x_1, x_2, \dots, x_k\}$ .

567 **Theorem 8.** *There exists an algorithm which plays the list  $L_t$  defined above and incurs a total regret*  
 568 *of at most  $O(d^2 \log d)$ .*

569 *Proof.* The overall structure of the proof will be as follows: we will show that for each integer  $j \geq 0$ ,  
 570 the algorithm can incur loss between  $100d \cdot 2^{-j}$  and  $200d \cdot 2^{-j}$  at most  $O(jd)$  times. Hence the total  
 571 loss of the algorithm can be bounded by  $\sum_{j=1}^{\infty} O(jd) \cdot 2^{-j} d \leq O(d^2 \log d)$ .  
 572

*Potential function:* This will be done via a potential function argument. As usual, we will keep  
 track of knowledge  $K_t$  which corresponds to all possible values of  $w$  that are consistent with the  
 observations seen so far.  $K_1 = B$  and:

$$K_{t+1} = K_t \cap [\cap_{i \in L_t} \{w \in \mathbb{R}^d; \langle x^* - x, w \rangle \geq 0\}]$$

Associated with  $K_t$  we will keep track of a family of potential functions:

$$\Phi_t^j = \text{Vol}(K_t + 2^{-j}B)$$

573 Since  $K_1 \supseteq K_2 \supseteq K_3 \supseteq \dots$  the potentials will be non-increasing:  $\Phi_1^j \geq \Phi_2^j \geq \Phi_3^j \geq \dots$ . One other  
574 important property is that the potential functions are lower bounded:

$$\Phi_j^t \geq \text{Vol}(2^{-j}B) = 2^{-jd} \text{Vol}(B) \quad (14)$$

We will argue that if we can bound the loss at any given step  $t$  by  $200 \cdot 2^{-j}d$ , then  $\Phi_{t+1}^j \leq 0.9 \cdot \Phi_t^j$ .  
Because of the lower bound in equation 14, this can happen at most

$$O\left(\log\left(\frac{\Phi_j^1}{2^{-jd} \text{Vol}(B)}\right)\right) = O\left(\log\left(\frac{(1 + 2^{-j})^d \text{Vol}(B)}{2^{-jd} \text{Vol}(B)}\right)\right) \leq O(jd)$$

*Bounding the loss:* We start by bounding the loss and depending on the loss we will show a constant decrease in a corresponding potential function. Let

$$x^* \in \arg \max_{x \in \mathcal{X}_t} \langle w^*, x \rangle$$

575 If  $x^*$  is in the convex hull of  $L_t$  then there must some of the points in  $x_i \in L_t$  that is also optimal,  
576 in which case the algorithm incurs zero loss in this round and we can ignore it. Otherwise, we can  
577 assume that  $x^*$  is not in the convex hull of  $L_t$ .

In that case, define for each  $x_i \in L_t$  the vector:

$$v_i = \frac{x^* - x_i}{\|x^* - x_i\|_2}$$

Consider the index  $i$  that minimizes  $\text{width}(K; v_i)$  and use this point to bound the loss:

$$\begin{aligned} \text{loss}_t &= \min_{x \in L_t} \langle w^*, x^* - x \rangle \leq \langle w^*, x^* - x_i \rangle \leq \langle w^* - p_i, x^* - x_i \rangle \\ &= \langle w^* - p_i, v_i \rangle \cdot \|x^* - x_i\| \leq 2 \langle w^* - p_i, v_i \rangle \leq 2 \text{width}(K, v_i) \end{aligned}$$

578 The second inequality above follows from the definition of  $x_i$  since  $x_i \in \arg \max_{x \in \mathcal{X}_t} \langle p_i, x \rangle$  it  
579 follows that  $\langle p_i, x_i - x^* \rangle \geq 0$ .

580

*Charging the loss to the potential* We will now charge this loss to the potential. For that we first define an index  $j$  such that:

$$j = - \left\lceil \frac{\text{width}(K, v_i)}{100d} \right\rceil$$

With this definition we have:

$$\text{loss}_t \leq 2 \text{width}(K, v_i) \leq 200d2^{-j}$$

581 Our final step is to show that the potential  $\Phi_t^j$  decreases by a constant factor. For that we will use a  
582 combination of the discretization in Theorem 5 and the volume reduction guarantee in Lemma 3.

First consider the point:

$$g_i = \text{cg}(K + 2^{-j}B)$$

Since it is on the curvature path, there is a discretized point  $p_\ell \in D$  such that:

$$|\langle v_\ell, g_i - p_\ell \rangle| \leq \text{width}(K, v_\ell)/(50d)$$

Together with the facts that  $\langle w^*, v_\ell \rangle \geq 0$  and  $\langle p_\ell, v_\ell \rangle \leq 0$  we obtain that:

$$\langle w^* - g_i, v_\ell \rangle = \langle w^* - p_\ell, v_\ell \rangle + \langle p_\ell - g_i, v_\ell \rangle \geq -\text{width}(K, v_\ell)/(50d)$$

This in particular implies that:

$$K_{t+1} \subseteq \tilde{K}_{t+1} := K_t \cap \{w \in \mathbb{R}^d; \langle w - g_i, v_\ell \rangle \geq -\text{width}(K, v_\ell)/(50d)\}$$

We are now in the position of applying Lemma 3 with  $r = 2^{-j}$ . Note that

$$r = 2^{-j} \leq \frac{\text{width}(K, v_i)}{50d} \leq \frac{\text{width}(K, v_\ell)}{50d}$$

where the last inequality follows from the choice of the index  $i$  as the one minimizing  $\text{width}(K, v_i)$ .  
Applying the Theorem, we obtain that:

$$\text{Vol}(K_{t+1} + 2^{-j}B) \leq \text{Vol}(\tilde{K}_{t+1} + 2^{-j}B) \leq 0.9 \cdot \text{Vol}(K_t + 2^{-j}B)$$

583 which is the desired decrease in the  $\Phi_t^j$  potential. This concludes the proof.  $\square$

## 6 Local Contextual Recommendation

In this section, we consider the *local contextual recommendation* problem, in which we may choose a list of actions  $L_t \subseteq \mathcal{X}_t$  and our feedback is some  $x_t^{\text{loc}}$  such that  $\langle x_t^{\text{loc}}, w^* \rangle \geq \max_{x \in L_t} \langle x, w^* \rangle$ . In other words, the feedback may not be the optimal action but it must at least be as good as the local optimum in  $L_t$ . The goal is the same as before: minimize the total expected regret  $\mathbb{E}[\text{Reg}] = \mathbb{E} \left[ \sum_{t=1}^T \langle x_t^* - x_t, w^* \rangle \right]$  where  $x_t^* \in \arg \max_{x \in \mathcal{X}_t} \langle x, w^* \rangle$ .

It should be noted that, in this model, it is impossible to achieve non-trivial regret if the list size  $|L_t|$  is only one, since the feedback will always be the unique element, providing no information at all. Below we show that it is possible to achieve bounded regret algorithm even when  $|L_t| = 2$ , although the regret does depend on the total number of possible actions each round, i.e.  $\max_t |\mathcal{X}_t|$ . Furthermore, we show that, even when  $|L_t|$  is allowed to be as large as  $2^{\Omega(d)}$ , the expected regret of any algorithm remains at least  $2^{\Omega(d)}$ .

### 6.1 Low-regret algorithms

We use  $[a]_+$  as a shorthand for  $\max\{a, 0\}$ .

Our algorithm employs a reduction similar to that of Theorem 4. Specifically, we prove the following:

**Theorem 9.** *Suppose that  $|\mathcal{X}_t| \leq A$  for all  $t \in \mathbb{N}$ , and let  $H$  be any positive integer such that  $2 \leq H \leq A$ . Then, given a low-regret cutting-plane algorithm  $\mathcal{A}$  with regret  $\rho$ , we can construct an  $O(\rho \cdot A/(H-1))$ -regret algorithm for local contextual recommendation where the list size  $|L_t|$  in each step is at most  $H$ .*

Before we prove Theorem 9, notice that it can be combined with Theorem 5 and Theorem 6 respectively to yield the following algorithms for local contextual recommendation.

**Corollary 1.** *Suppose that  $|\mathcal{X}_t| \leq A$  for all  $t \in \mathbb{N}$ , and let  $H$  be any positive integer such that  $2 \leq H \leq A$ . Then, there is an  $O(A/(H-1) \cdot \exp(d \log d))$ -regret algorithm for local contextual recommendation where the list size  $|L_t|$  in each step is at most  $H$ .*

**Corollary 2.** *Suppose that  $|\mathcal{X}_t| \leq A$  for all  $t \in \mathbb{N}$ , and let  $H$  be any positive integer such that  $2 \leq H \leq A$ . Then, there is an  $O(A/(H-1) \cdot d \log T)$ -regret algorithm for local contextual recommendation where the list size  $|L_t|$  in each step is at most  $H$ .*

Note that these algorithms work for list sizes as small as  $H = 2$  but may also give a better regret bound if we allow larger lists.

We will now prove Theorem 9.

*Proof of Theorem 9.* Our algorithm is similar to that of Theorem 4, except that we also play  $H-1$  random actions from  $\mathcal{X}_t$  in addition to the action determined by the answer of  $\mathcal{A}$ . More formally, each round  $t$  of our algorithm works as follows:

- Ask  $\mathcal{A}$  for its query  $p_t$  to the separation oracle.
- Let  $x_t = \text{BR}_t(p_t)$ , and let  $L'_t \subseteq \mathcal{X}_t$  be a random subset of  $\mathcal{X}_t$  of size  $\min\{H-1, |\mathcal{X}_t|\}$ .
- Output the list  $L_t = \{x_t\} \cup L'_t$ .
- Let  $x_t^{\text{loc}}$  be the feedback.
- If  $x_t^{\text{loc}} \neq x_t$ , do the following:
  - Return  $v_t = (x_t^{\text{loc}} - x_t)/\|x_t^{\text{loc}} - x_t\|$  to  $\mathcal{A}$ .
  - Update the knowledge set  $K_{t+1} = \{w \in K_t \mid \langle x_t^{\text{loc}} - x_t, w \rangle \geq 0\}$ .

We will now show that the expected regret of the algorithm is at most  $\rho \cdot A/(H-1)$ . From the regret bound of  $\mathcal{A}$ , the following holds regardless of the randomness of our algorithm:

$$\begin{aligned} \rho &\geq \sum_{t: x_t^{\text{loc}} \neq x_t} \left\langle \frac{x_t^{\text{loc}} - x_t}{\|x_t^{\text{loc}} - x_t\|}, w^* - p_t \right\rangle \geq \sum_{t: x_t^{\text{loc}} \neq x_t} 0.5 \langle x_t^{\text{loc}} - x_t, w^* - p_t \rangle \\ &= 0.5 \left( \sum_t \langle x_t^{\text{loc}} - x_t, w^* - p_t \rangle \right). \end{aligned}$$

626 From the requirement of  $x_t^{\text{loc}}$ , we may further bound  $\langle x_t^{\text{loc}} - x_t, w^* - p_t \rangle$  by

$$\langle x_t^{\text{loc}} - x_t, w^* - p_t \rangle \geq \max_{x \in L_t} \langle x - x_t, w^* - p_t \rangle = \max_{x' \in L'_t} [\langle x' - x_t, w^* - p_t \rangle]_+.$$

627 Hence, from the above two inequalities, we arrive at

$$2\rho \geq \sum_t \max_{x' \in L'_t} [\langle x' - x_t, w^* - p_t \rangle]_+.$$

628 Next, observe that

$$\begin{aligned} \mathbb{E} \left[ \max_{x' \in L'_t} [\langle x' - x_t, w^* - p_t \rangle]_+ \right] &\geq \Pr[x_t^* \in L'_t] \cdot \langle x_t^* - x_t, w^* - p_t \rangle \\ &= \frac{|L'_t|}{|\mathcal{X}_t|} \cdot \langle x_t^* - x_t, w^* - p_t \rangle \\ &\geq \frac{H-1}{A} \cdot \langle x_t^* - x_t, w^* - p_t \rangle. \end{aligned}$$

629 Combining the above two inequalities, we get

$$2\rho \geq \frac{H-1}{A} \cdot \mathbb{E} \left[ \sum_t \langle x_t^* - x_t, w^* \rangle \right].$$

630 From this, we can conclude that the expected regret, which is equal to  $\mathbb{E} [\sum_t \langle x_t^* - x_t, w^* \rangle]$ , is at  
631 most  $O(\rho \cdot A/(H-1))$  as desired.  $\square$

## 632 6.2 Lower Bound

633 We will now prove our lower bound. The overall idea of the construction is simple: we provide an  
634 action set that contains a “reasonably good” (publicly known) action so that, unless the optimum is  
635 selected in the list, the adversary can return this reasonably good action, resulting in the algorithm  
636 not learning any new information at all.

637 **Theorem 10.** *Any algorithm for the local contextual recommendation problem that can output a list*  
638 *of size up to  $2^{\Omega(d)}$  in each step incurs expected regret of at least  $2^{\Omega(d)}$ .*

639 *Proof.* Let  $S$  be any maximal set of vectors in  $B_d$  such that the first coordinate is zero and the inner  
640 product between any pair of them is at most 0.1. By standard volume argument, we have  $|S| \geq 2^{\Omega(d)}$ .  
641 Furthermore, let  $e_1$  be the first vector in the standard basis. Consider the adversary that picks  $u \in S$   
642 uniformly at random and let  $w^* = 0.2e_1 + 0.8u$  and let  $X_t = S \cup \{e_1\}$  for all  $t \in \mathbb{N}$ . The adversary  
643 feedback is as follows: if  $u \notin L_t$ , return  $e_1$ ; otherwise, return  $u$ .

644 We will now argue that any algorithm occurs expected regret at least  $2^{\Omega(d)}$ , even when allows to  
645 output a list  $L_t$  of size as large as  $\lfloor \sqrt{|S|} \rfloor = 2^{\Omega(d)}$  in each step. From Yao’s minimax principle, it  
646 suffices to consider only any deterministic algorithm  $\mathcal{A}$ . Let  $L_t^0$  denote the list output by  $\mathcal{A}$  at step  $t$   
647 if it had received feedback  $e_1$  in all previous steps.

648 Observe also that in each step for which  $u \notin L_t$ , the loss of  $\mathcal{A}$  is at least 0.6. Furthermore, in  
649 the first  $m = \lfloor 0.1\sqrt{|S|} \rfloor$  rounds, the probability that the algorithm selects  $u$  in any list is at most  
650  $\frac{m\sqrt{|S|}}{|S|} \leq 0.1$ . Hence we can bound the the expected total regret of  $\mathcal{A}$  as:

$$\mathbb{E}[0.6 \cdot |\{t \mid u \notin L_t\}|] \geq 0.6m \Pr[u \notin \cup_{t=1}^m L_t] = 0.6m \Pr[u \notin \cup_{t=1}^m L_t^0] \geq 0.6m \cdot 0.9 \geq 2^{\Omega(d)}$$

651 which concludes our proof.  $\square$

## 652 References

- 653 [1] CJ Argue, Anupam Gupta, Guru Guruganesh, and Ziyue Tang. Chasing convex bodies with  
654 linear competitive ratio. In *Proceedings of the Fourteenth Annual ACM-SIAM Symposium on*  
655 *Discrete Algorithms*, pages 1519–1524. SIAM, 2020.

- 656 [2] Peter Auer. Using confidence bounds for exploitation-exploration trade-offs. *Journal of Machine*  
657 *Learning Research*, 3(Nov):397–422, 2002.
- 658 [3] Baruch Awerbuch and Robert D Kleinberg. Adaptive routing with end-to-end feedback: Dis-  
659 tributed learning and geometric approaches. In *Proceedings of the thirty-sixth annual ACM*  
660 *symposium on Theory of computing*, pages 45–53, 2004.
- 661 [4] Dimitris Bertsimas and Santosh Vempala. Solving convex programs by random walks. *Journal*  
662 *of the ACM (JACM)*, 51(4):540–556, 2004.
- 663 [5] Jesús Bobadilla, Fernando Ortega, Antonio Hernando, and Abraham Gutiérrez. Recommender  
664 systems survey. *Knowledge-based systems*, 46:109–132, 2013.
- 665 [6] Sébastien Bubeck, Yin Tat Lee, and Mohit Singh. A geometric alternative to nesterov’s  
666 accelerated gradient descent. *CoRR*, abs/1506.08187, 2015. URL [http://arxiv.org/abs/](http://arxiv.org/abs/1506.08187)  
667 [1506.08187](http://arxiv.org/abs/1506.08187).
- 668 [7] Sébastien Bubeck, Bo’az Klartag, Yin Tat Lee, Yuanzhi Li, and Mark Sellke. Chasing nested  
669 convex bodies nearly optimally. In *Proceedings of the Fourteenth Annual ACM-SIAM Symposi-*  
670 *um on Discrete Algorithms*, pages 1496–1508. SIAM, 2020.
- 671 [8] Wei Chu, Lihong Li, Lev Reyzin, and Robert Schapire. Contextual bandits with linear payoff  
672 functions. In *Proceedings of the Fourteenth International Conference on Artificial Intelligence*  
673 *and Statistics*, pages 208–214. JMLR Workshop and Conference Proceedings, 2011.
- 674 [9] Maxime C Cohen, Ilan Lobel, and Renato Paes Leme. Feature-based dynamic pricing. In  
675 *Proceedings of the 2016 ACM Conference on Economics and Computation*, pages 817–817.  
676 ACM, 2016.
- 677 [10] Martin Grötschel, László Lovász, and Alexander Schrijver. The ellipsoid method and its  
678 consequences in combinatorial optimization. *Combinatorica*, 1(2):169–197, 1981.
- 679 [11] András György and György Ottucsak. Adaptive routing using expert advice. *The Computer*  
680 *Journal*, 49(2):180–189, 2006.
- 681 [12] András György, Tamás Linder, Gábor Lugosi, and György Ottucsák. The on-line shortest path  
682 problem under partial monitoring. *Journal of Machine Learning Research*, 8(10), 2007.
- 683 [13] Ravi Kannan, László Lovász, and Miklós Simonovits. Isoperimetric problems for convex bodies  
684 and a localization lemma. *Discrete & Computational Geometry*, 13(3):541–559, 1995.
- 685 [14] Leonid Genrikhovich Khachiyan. A polynomial algorithm in linear programming. In *Doklady*  
686 *Akademii Nauk*, volume 244, pages 1093–1096. Russian Academy of Sciences, 1979.
- 687 [15] Branislav Kveton, Zheng Wen, Azin Ashkan, and Csaba Szepesvari. Combinatorial cascading  
688 bandits. *arXiv preprint arXiv:1507.04208*, 2015.
- 689 [16] Renato Paes Leme and Jon Schneider. Contextual search via intrinsic volumes. In *2018 IEEE*  
690 *59th Annual Symposium on Foundations of Computer Science (FOCS)*, pages 268–282. IEEE,  
691 2018.
- 692 [17] Lihong Li, Wei Chu, John Langford, and Robert E Schapire. A contextual-bandit approach to  
693 personalized news article recommendation. In *Proceedings of the 19th international conference*  
694 *on World wide web*, pages 661–670, 2010.
- 695 [18] Lihong Li, Wei Chu, John Langford, and Xuanhui Wang. Unbiased offline evaluation of  
696 contextual-bandit-based news article recommendation algorithms. In *Proceedings of the fourth*  
697 *ACM international conference on Web search and data mining*, pages 297–306, 2011.
- 698 [19] Allen Liu, Renato Paes Leme, and Jon Schneider. Optimal contextual pricing and extensions.  
699 In *Proceedings of the 2021 ACM-SIAM Symposium on Discrete Algorithms (SODA)*, pages  
700 1059–1078. SIAM, 2021.
- 701 [20] Ilan Lobel, Renato Paes Leme, and Adrian Vladu. Multidimensional binary search for contextual  
702 decision-making. *Operations Research*, 2017.

- 703 [21] Rolf Schneider. *Convex bodies: the Brunn–Minkowski theory*. Number 151. Cambridge  
704 university press, 2014.
- 705 [22] Mark Sellke. Chasing convex bodies optimally. In *Proceedings of the Fourteenth Annual*  
706 *ACM-SIAM Symposium on Discrete Algorithms*, pages 1509–1518. SIAM, 2020.
- 707 [23] Linqi Song, Cem Tekin, and Mihaela Van Der Schaar. Online learning in large-scale contextual  
708 recommender systems. *IEEE Transactions on Services Computing*, 9(3):433–445, 2014.
- 709 [24] Mohammad Sadegh Talebi, Zhenhua Zou, Richard Combes, Alexandre Proutiere, and Mikael  
710 Johansson. Stochastic online shortest path routing: The value of feedback. *IEEE Transactions*  
711 *on Automatic Control*, 63(4):915–930, 2017.
- 712 [25] Liang Tang, Yexi Jiang, Lei Li, and Tao Li. Ensemble contextual bandits for personalized  
713 recommendation. In *Proceedings of the 8th ACM Conference on Recommender Systems*, pages  
714 73–80, 2014.
- 715 [26] Romain Warlop, Alessandro Lazaric, and Jérémie Mary. Fighting boredom in recommender  
716 systems with linear reinforcement learning. In *Neural Information Processing Systems*, 2018.
- 717 [27] Yisong Yue, Josef Broder, Robert Kleinberg, and Thorsten Joachims. The k-armed dueling  
718 bandits problem. *Journal of Computer and System Sciences*, 78(5):1538–1556, 2012.
- 719 [28] Zhenhua Zou, Alexandre Proutiere, and Mikael Johansson. Online shortest path routing: The  
720 value of information. In *2014 American Control Conference*, pages 2142–2147. IEEE, 2014.

## 721 Checklist

- 722 1. For all authors...
- 723 (a) Do the main claims made in the abstract and introduction accurately reflect the paper’s  
724 contributions and scope? [Yes]
- 725 (b) Did you describe the limitations of your work? [Yes]
- 726 (c) Did you discuss any potential negative societal impacts of your work? [N/A]
- 727 (d) Have you read the ethics review guidelines and ensured that your paper conforms to  
728 them? [Yes]
- 729 2. If you are including theoretical results...
- 730 (a) Did you state the full set of assumptions of all theoretical results? [Yes]
- 731 (b) Did you include complete proofs of all theoretical results? [Yes]
- 732 3. If you ran experiments...
- 733 (a) Did you include the code, data, and instructions needed to reproduce the main experi-  
734 mental results (either in the supplemental material or as a URL)? [N/A]
- 735 (b) Did you specify all the training details (e.g., data splits, hyperparameters, how they  
736 were chosen)? [N/A]
- 737 (c) Did you report error bars (e.g., with respect to the random seed after running experi-  
738 ments multiple times)? [N/A]
- 739 (d) Did you include the total amount of compute and the type of resources used (e.g., type  
740 of GPUs, internal cluster, or cloud provider)? [N/A]
- 741 4. If you are using existing assets (e.g., code, data, models) or curating/releasing new assets...
- 742 (a) If your work uses existing assets, did you cite the creators? [N/A]
- 743 (b) Did you mention the license of the assets? [N/A]
- 744 (c) Did you include any new assets either in the supplemental material or as a URL? [N/A]
- 745
- 746 (d) Did you discuss whether and how consent was obtained from people whose data you’re  
747 using/curating? [N/A]
- 748 (e) Did you discuss whether the data you are using/curating contains personally identifiable  
749 information or offensive content? [N/A]
- 750 5. If you used crowdsourcing or conducted research with human subjects...

- 751 (a) Did you include the full text of instructions given to participants and screenshots, if  
752 applicable? [N/A]
- 753 (b) Did you describe any potential participant risks, with links to Institutional Review  
754 Board (IRB) approvals, if applicable? [N/A]
- 755 (c) Did you include the estimated hourly wage paid to participants and the total amount  
756 spent on participant compensation? [N/A]
